# Supplementary material for: Grading of aortic regurgitation by cardiovascular magnetic resonance and pulsed Doppler of the left subclavian artery: harmonizing grading scales between imaging modalities
Source: Springer Nature journal article supplement (doi:10.1007/s10554-020-01844-2), 2020-04-18
Supplement: MOESM1 [file 17907314]

**Online Resource 1** Same grading scale for aortic regurgitation: Agreement of a multiparametric transthoracic echocardiography approach (TTE) with cardiovascular magnetic resonance (CMR) and Doppler of the left subclavian artery (LSA).

|                       | TTE           |               |               | S                              | M-S               |
|-----------------------|---------------|---------------|---------------|--------------------------------|-------------------|
|                       | Mild AR       | Moderate AR   | Severe AR     |                                |                   |
| <b>CMR #</b>          |               |               |               |                                |                   |
| <b>Mild</b>           | <b>23</b>     | 5             |               | 28 (45.9%)                     | Sensitivity 61.5% |
| <b>Moderate</b>       |               | <b>7</b>      | 10            | 17 (27.9%)                     | Specificity 100%  |
| <b>Severe</b>         |               |               | <b>16</b>     | 16 (26.2%)                     | Accuracy 83.6%    |
|                       | 23<br>(37.7%) | 12<br>(19.7%) | 26<br>(42.6%) | <b>46/61</b><br><b>(75.4%)</b> | 91.8%             |
| <b>LSA Doppler ¶¶</b> |               |               |               |                                |                   |
| <b>Mild</b>           | <b>22</b>     | 2             |               | 24 (39.3%)                     | Sensitivity 50%   |
| <b>Moderate</b>       | 1             | <b>10</b>     | 13            | 24 (39.3%)                     | Specificity 100%  |
| <b>Severe</b>         |               |               | <b>13</b>     | 13 (21.3%)                     | Accuracy 78.7%    |
|                       | 23<br>(37.7%) | 12<br>(19.7%) | 26<br>(42.6%) | <b>45/61</b><br><b>(73.8%)</b> | 95.1%             |

- Grading scale for CMR and LSA Doppler: mild, <30%; moderate, 31% to 49%; and severe, >50%

- Diagnostic test analyses: first column **S**, for severe AR; second column **M-S**, for moderate to severe AR.

- Overall agreement: # **Kappa 0.628** (p <0.0001); ¶¶ **Kappa 0.616** (p <0.0001).

From: Grading of aortic regurgitation by cardiovascular magnetic resonance and pulsed Doppler of the left subclavian artery: Harmonizing grading scales between imaging modalities. Ricardo A. Spampinato, Cosima Jahnke, Ingo Paetsch, Sebastian Hilbert, Susanne Löbe, Frank Lindemann, Elfriede Strottdrees, Gerhard Hindricks, Michael A. Borger. The International Journal of Cardiovascular Imaging.
